# Supplementary material for: Epithelial insulin receptor expression–prognostic relevance in colorectal cancer
Source: PubMed Central journal article supplement (PMC6331016; doi:10.18632/oncotarget.26490), 2018-12-25
Supplement: oncotarget-09-37497-s001.pdf [file oncotarget-09-37497-s001.pdf]

## Epithelial insulin receptor expression–prognostic relevance in colorectal cancer

### SUPPLEMENTARY MATERIALS

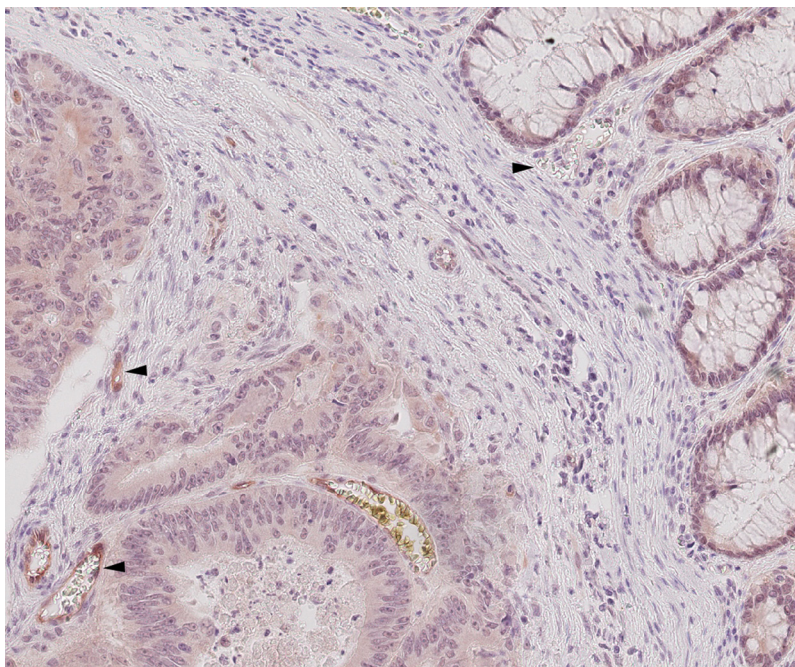

Supplementary Figure 1: Example of vascular insulin receptor expression within the tumor site (arrow heads, lower left corner) and adjacent normal mucosa without vascular insulin receptor expression (arrow head, upper right corner) in a CRC whole tissue-slide.

Supplementary Table 1: Vascular insulin receptor expression as assessed by immunohistochemistry versus *in situ* hybridization

| VIR score vascular insulin receptor expression (immunohistochemistry) | Vascular insulin receptor isoform A expression ( <i>in situ</i> hybridization) |              |
|-----------------------------------------------------------------------|--------------------------------------------------------------------------------|--------------|
|                                                                       | negative                                                                       | positive     |
|                                                                       | <i>n</i> (%)                                                                   | <i>n</i> (%) |
| 0                                                                     | 2 (28.6)                                                                       | 5 (71.4)     |
| 1                                                                     | 1 (7.7)                                                                        | 12 (92.3)    |
| 2                                                                     | 2 (2.7)                                                                        | 73 (97.3)    |
| 3                                                                     | 2 (1.8)                                                                        | 108 (98.2)   |

$P = 0.032$  (Kendall's tau-b)
